# Supplementary material for: Disruption of PAK3 Signaling in Social Interaction Induced cFos Positive Cells Impairs Social Recognition Memory
Source: MDPI journal article supplement (doi:10.3390/cells10113010), 2021-11-04
Supplement: s1 [file s1]

## Supplementary Figures

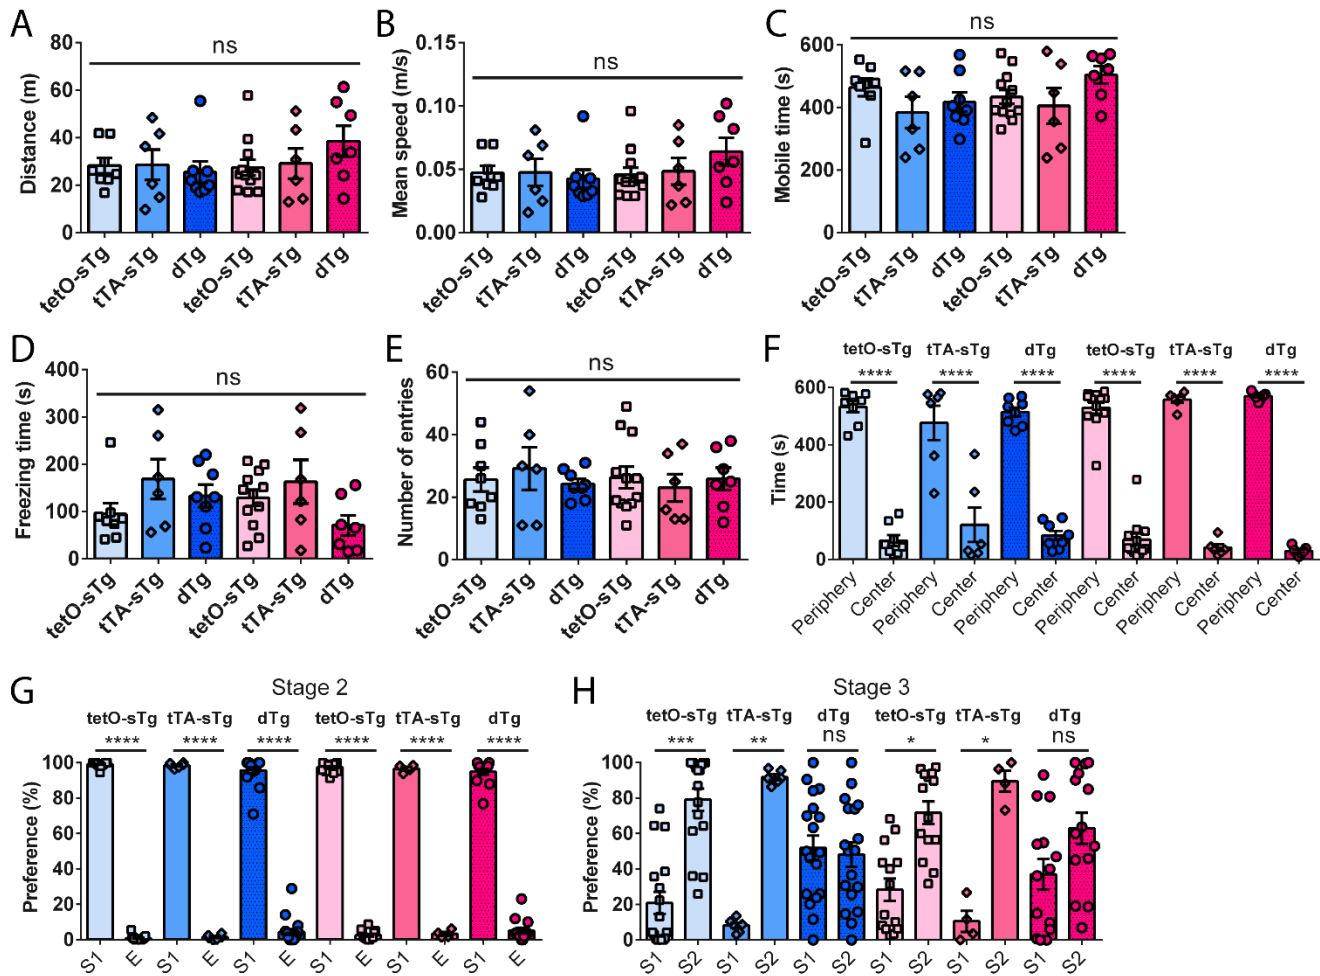

Figure S1. No sex differences observed between tetO-sTg, tTA-sTg and dTg animals in basal locomotor and anxiety levels, or social memory. Male and female tetO-sTg, tTA-sTg, and dTg mice showed no differences in (A) distance  $F(5, 41) = 0.8455$ ,  $p = 0.5256$ , (B) mean speed  $F(5, 41) = 0.8337$ ,  $p = 0.5334$ , (C) mobile time  $F(5, 41) = 1.414$ ,  $p = 0.2397$ , (D) freezing time  $F(5, 41) = 1.685$ ,  $p = 0.1599$ , (E) entries to the center  $F(5, 41) = 0.2249$ ,  $p = 0.9497$ , and (F) time spent in periphery and center zones  $F(1, 41) = 474.1$ ;  $p < 0.0001$ , post-hoc all groups  $p < 0.0001$ , between groups  $F(5, 41) = 0.3012$ ;  $p = 0.9093$ , of the open field test; male tetO-sTg  $n = 8$ , male tTA-sTg  $n = 6$ , male dTg  $n = 8$ , female tetO-sTg  $n = 12$ , female tTA-sTg  $n = 6$ , female dTg  $n = 7$ . Males and females of each control and dTg mouse group also showed no differences in (G) stage 2  $F(1, 67) = 5283$ ;  $p < 0.0001$ , post-hoc all groups  $p < 0.0001$ , between groups  $F(5, 67) = 0.5788$ ;  $p = 0.7160$ , or (H) stage 3  $F(1, 67) = 43.12$ ;  $p < 0.0001$ , post-hoc analysis: male tetO-sTg  $p = 0.0002$ , male tTA-sTg  $p = 0.0013$ , male dTg  $p = 0.7670$ , female tetO-sTg  $p = 0.0128$ , female tTA-sTg  $p = 0.0128$ , female dTg  $p = 0.1403$ , between groups  $F(5, 67) = 2.303$ ;  $p = 0.0543$ , post-hoc male tetO vs. dTg  $p = 0.0210$ , male tTA vs. dTg  $p = 0.0196$ , of the three-chamber social interaction test; male tetO-sTg  $n = 17$ , male tTA-sTg  $n = 6$ , male dTg  $n = 18$ , female tetO-sTg  $n = 14$ , female tTA-sTg  $n = 4$ , female dTg  $n = 14$ . dTg, double transgenic; sTg, single transgenic; S1, stranger 1; S2, stranger 2; E, empty cage. \* $p < 0.05$ , \*\* $p < 0.01$ , \*\*\* $p < 0.001$ , \*\*\*\* $p < 0.0001$ .

0.0001, two-tailed unpaired t-test, two-way RM ANOVA, post-hoc Holm-Sidak comparisons. Data are expressed as mean  $\pm$  SEM. n = number of mice.

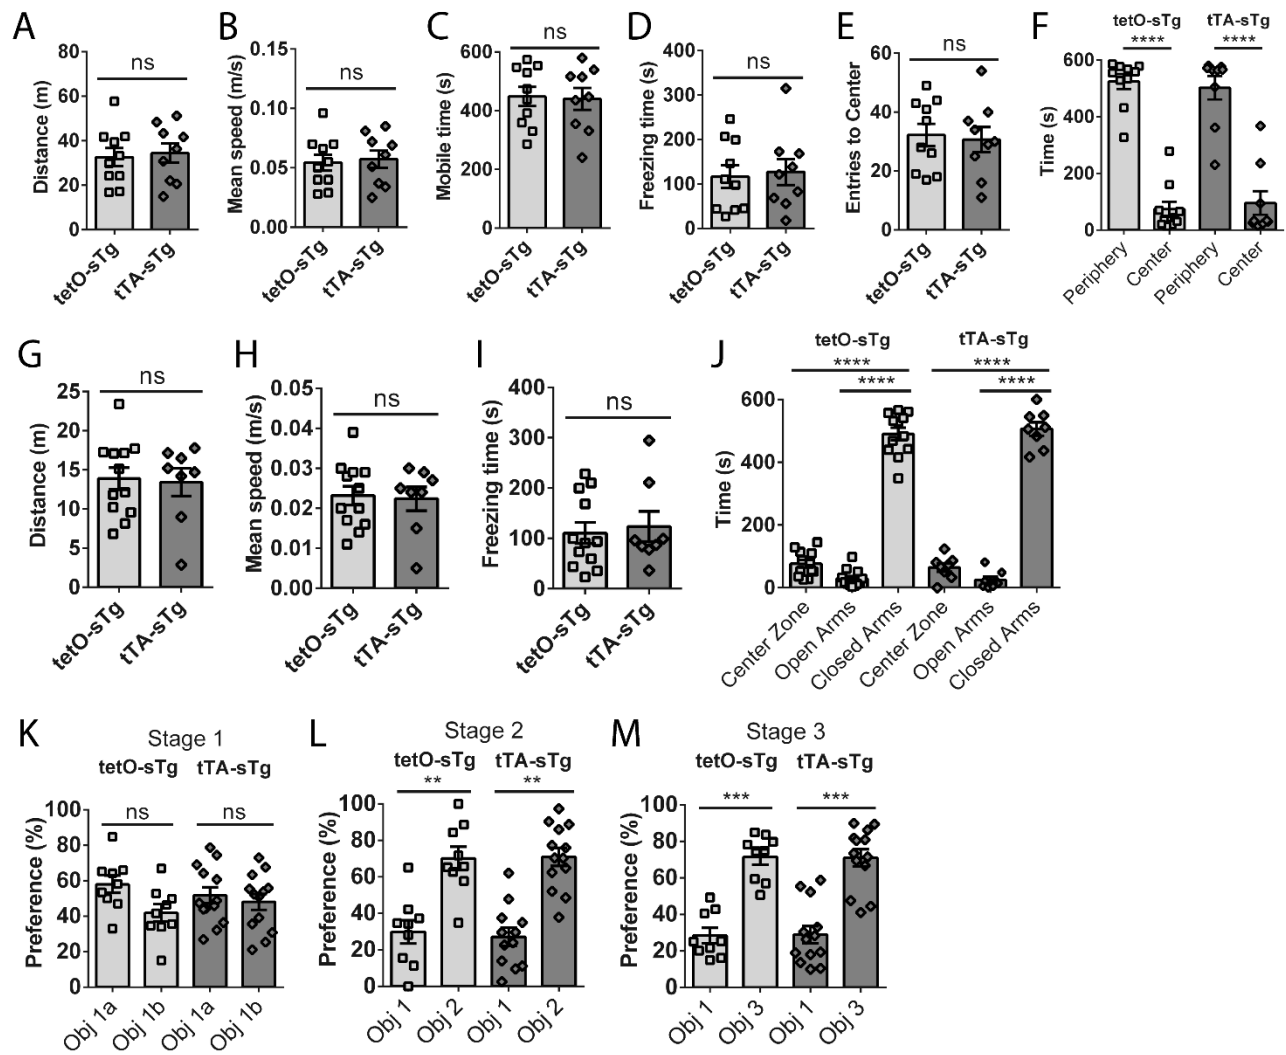

Figure S2. No genotype differences observed between tetO-sTg and tTA-sTg animals in basal locomotion, anxiety, or novelty preference. The tetO-sTg and tTA-sTg mouse groups showed no differences in (A) distance  $t(17) = 0.2980$ ,  $p = 0.7693$ , (B) mean speed  $t(17) = 0.2856$ ,  $p = 0.7786$ , (C) mobile time  $t(17) = 0.1703$ ,  $p = 0.8668$ , (D) freezing time  $t(17) = 0.2743$ ,  $p = 0.7872$ , (E) entries to the center  $t(17) = 0.2687$ ,  $p = 0.7914$ , and (F) time spent in periphery and center zones  $F(1, 17) = 80.28$ ;  $p < 0.0001$ , post-hoc both groups  $p < 0.0001$ , between genotypes  $F(1, 17) = 0.2974$ ;  $p = 0.5926$ , of the open field test; tetO-sTg  $n = 10$ , tTA-sTg  $n = 9$ . TetO-sTg and tTA-sTg mouse groups also showed no differences in (G) distance  $t(18) = 0.2007$ ,  $p = 0.8432$ , (H) mean speed  $t(18) = 0.2102$ ,  $p = 0.8359$ , (I) freezing time  $t(18) = 0.3654$ ,  $p = 0.7190$ , and (J) time spent in arms  $F(2, 36) = 392.0$ ;  $p < 0.0001$ , post-hoc center-closed and open-closed arms of both groups  $p < 0.0001$ , between genotypes  $F(1, 18) = 0.02684$ ;  $p = 0.8717$ , post-hoc  $p = 0.8480$ , of the elevated plus maze test; tetO-sTg  $n = 12$ , tTA-sTg  $n = 8$ . No differences were found in (K) stage 1  $F(1, 20) = 2.151$ ;  $p = 0.1580$ , post-hoc tetO-sTg  $p = 0.2552$ , tTA-sTg  $p = 0.6710$ , between genotypes  $F(1, 20) = 1.176$ ;  $p = 0.2910$ , post-hoc  $p = 0.5975$ , (L) stage 2  $F(1, 20) = 26.90$ ;  $p < 0.0001$ , post-hoc tetO-sTg  $p = 0.0035$ , tTA-sTg  $p = 0.0010$ , between genotypes  $F(1, 20) = 0.02525$ ;  $p = 0.8753$ , post-hoc  $p = 0.9929$ , or (M) stage 3  $F(1, 20) =$

41.36;  $p < 0.0001$ , post-hoc tetO-sTg  $p = 0.0004$ , tTA-sTg  $p = 0.0001$ , between genotypes  $F(1, 20) = 33.68$ ;  $p < 0.0001$ , post-hoc  $p = 0.9973$ , of tetO-sTg and tTA-sTg groups for the novel object recognition test; tetO-sTg  $n = 9$ , tTA-sTg  $n = 13$ . sTg, single transgenic; Obj, object. \*\* $p < 0.01$ , \*\*\* $p < 0.001$ , \*\*\*\*  $p < 0.0001$ , two-tailed unpaired t-test, two-way RM ANOVA, post-hoc Holm-Sidak comparisons. Data are expressed as mean  $\pm$  SEM.  $n$  = number of mice.

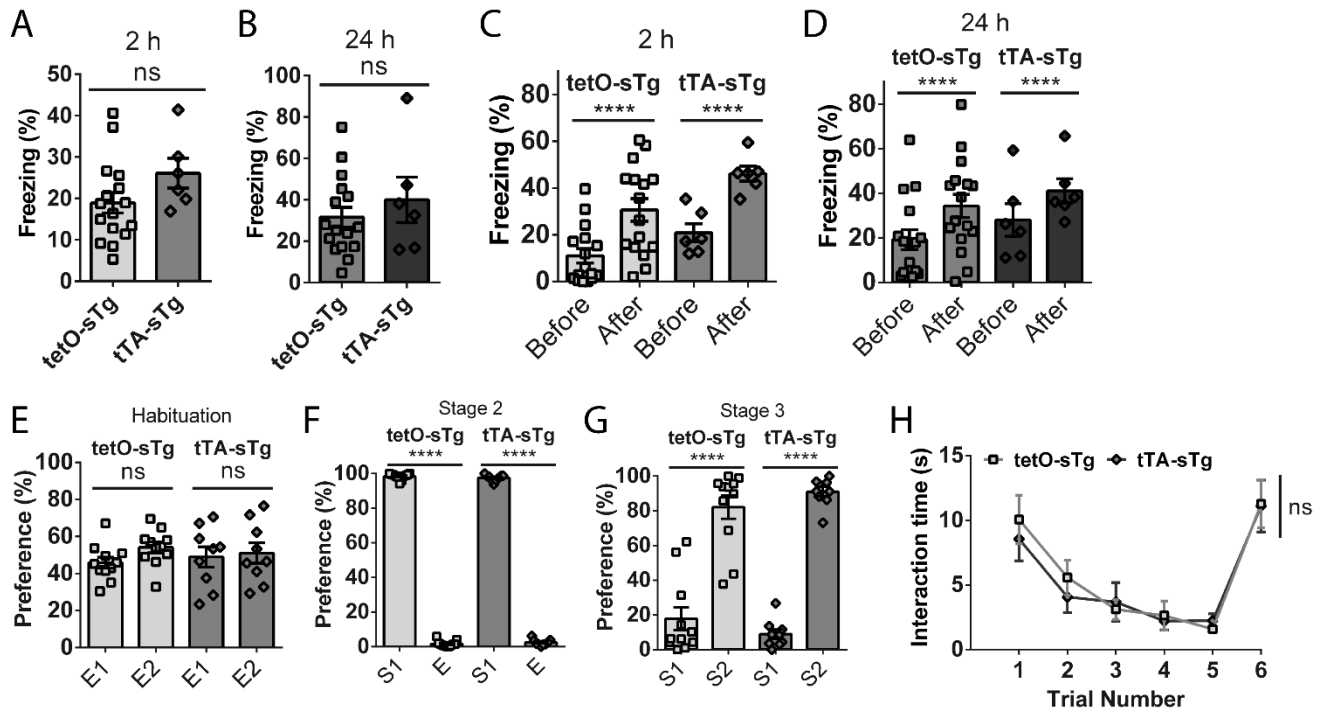

Figure S3. No genotype differences observed between tetO-sTg and tTA-sTg animals in basal fear and social memory. (A) Short-term contextual  $t(20) = 1.552$ ,  $p = 0.1365$ , (B) long-term contextual  $t(20) = 0.8181$ ;  $p = 0.4229$ , (C) short-term cued  $F(1, 20) = 67.59$ ;  $p < 0.0001$ , post-hoc tetO-sTg  $p < 0.0001$ , tTA-sTg  $p < 0.0001$ , between genotypes  $F(1, 20) = 3.877$ ;  $p = 0.0630$ , post-hoc before  $p = 0.1668$ , after  $p = 0.0635$ , and (D) long-term cued  $F(1, 20) = 24.36$ ;  $p < 0.0001$ , post-hoc tetO-sTg  $p = 0.0001$ , tTA-sTg  $p = 0.0142$ , between genotypes  $F(1, 20) = 0.8522$ ;  $p = 0.3669$ , post-hoc before  $p = 0.5498$ , after  $p = 0.5498$ , fear conditioning memory tests also showed no differences between tetO- and tTA-sTg mice; tetO-sTg  $n = 16$ , tTA-sTg  $n = 6$ . No differences between tetO- and tTA-sTg animals during (E) habituation (stage 1)  $F(1, 18) = 0.7699$ ;  $p = 0.3918$ , tetO-sTg  $p = 0.5232$ , tTA-sTg  $p = 0.8152$ , between genotypes  $F(1, 18) = 17.16$ ;  $p = 0.0006$ , post-hoc  $p = 0.8419$ , (F) stage 2  $F(1, 18) = 13.449$ ;  $p < 0.0001$ , post-hoc tetO-sTg  $p < 0.0001$ , tTA-sTg  $p < 0.0001$ , between genotypes  $F(1, 18) = 0.2882$ ;  $p = 0.5979$ , post-hoc  $p = 0.5496$ , or (G) stage 3  $F(1, 18) = 87.68$ ;  $p < 0.0001$ , post-hoc tetO-sTg  $p < 0.0001$ , tTA-sTg  $p < 0.0001$ , between genotypes  $F(1, 18) = 2.889$ ;  $p = 0.1064$ , post-hoc  $p = 0.4556$ , of the three-chamber social interaction test; tetO-sTg  $n = 11$ , tTA-sTg  $n = 9$ . (H) The five-trial social interaction assay showed no differences in social habituation and dishabituation of both control groups to sex-matched, juvenile strangers;  $F(5, 100) = 16.02$ ;  $p < 0.0001$ , post-hoc tetO-sTg trial 1 vs. 5  $p < 0.0001$ , tetO-sTg trial 5 vs. 6  $p < 0.0001$ , tTA-sTg trial 1 vs. 5  $p = 0.0328$ , tTA-sTg trial 5 vs. 6  $p = 0.0007$ , between genotypes  $F(1, 20) = 0.1944$ ;  $p = 0.6640$ , post-hoc trial 1  $p = 0.9707$ , trial 5  $p = 0.9953$ , trial 6  $p = 0.9953$ , tetO-sTg  $n = 13$ , tTA-sTg  $n = 9$ . dTg, double transgenic; sTg, single transgenic; S1, stranger 1; S2, stranger 2; E, empty cage. \*\*\*\*  $p < 0.0001$ , two-tailed unpaired t-test, two-way RM ANOVA, post-hoc Holm-Sidak comparisons. Data are expressed as mean  $\pm$  SEM.  $n$  = number of mice.

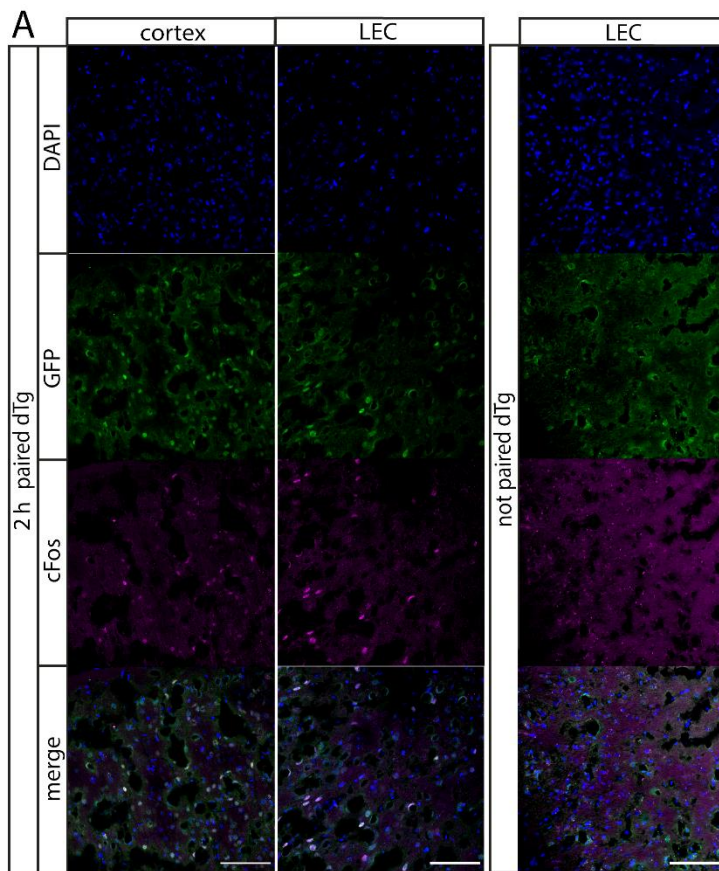

Figure S4. Additional mPAK3-GFP cells are activated in the cortex and LEC after a 2-hour social pairing session. (A) The expression of mPAK3-GFP proteins and overlapping cFos protein expression in L4/5 of the somatosensory cortex (cortex) and LEC of dTg and tTA-sTg mice after a 2 h social pairing interaction. Scale bars: 100  $\mu$ m. dTg, double transgenic; sTg, single transgenic; LEC, lateral entorhinal cortex.
